# Supplementary material for: Change in Magnetic Anisotropy at the Surface and in the Bulk of FINEMET Induced by Swift Heavy Ion Irradiation
Source: MDPI journal article supplement (doi:10.3390/nano12121962), 2022-06-08
Supplement: s1 [file s1]

# Change in Magnetic Anisotropy at the Surface and in the Bulk of FINEMET Induced by Swift Heavy Ion Irradiation

**Table S1.** Mössbauer hyperfine parameters of spectral components (shown in Figure 2) of FINEMET samples.

| Sextet | parameter                | Sample                  |                                                                                                |                         |                                                                                                |
|--------|--------------------------|-------------------------|------------------------------------------------------------------------------------------------|-------------------------|------------------------------------------------------------------------------------------------|
|        |                          | Non-irradiated<br>CK021 | Irradiated with<br>160 MeV $^{132}\text{Xe}$ ,<br>$1 \times 10^{13} \text{ ion cm}^{-2}$ CK021 | Non-irradiated<br>CK022 | Irradiated with<br>160 MeV $^{132}\text{Xe}$ ,<br>$1 \times 10^{13} \text{ ion cm}^{-2}$ CK022 |
| S1     | $\delta$ [mm s $^{-1}$ ] | 0.07 ( $\pm 0.01$ )     | 0.07 ( $\pm 0.01$ )                                                                            | 0.07 ( $\pm 0.01$ )     | 0.06 ( $\pm 0.01$ )                                                                            |
|        | $B$ [T]                  | 31.7 ( $\pm 0.1$ )      | 31.7 ( $\pm 0.1$ )                                                                             | 31.5 ( $\pm 0.1$ )      | 31.5 ( $\pm 0.1$ )                                                                             |
| S2     | $\delta$ [mm s $^{-1}$ ] | 0.08 ( $\pm 0.01$ )     | 0.08 ( $\pm 0.01$ )                                                                            | 0.08 ( $\pm 0.01$ )     | 0.07 ( $\pm 0.01$ )                                                                            |
|        | $B$ [T]                  | 28.8 ( $\pm 0.1$ )      | 28.8 ( $\pm 0.1$ )                                                                             | 28.6 ( $\pm 0.1$ )      | 28.6 ( $\pm 0.1$ )                                                                             |
| S3     | $\delta$ [mm s $^{-1}$ ] | 0.18 ( $\pm 0.01$ )     | 0.18 ( $\pm 0.01$ )                                                                            | 0.18 ( $\pm 0.01$ )     | 0.18 ( $\pm 0.01$ )                                                                            |
|        | $B$ [T]                  | 24.7 ( $\pm 0.1$ )      | 24.7 ( $\pm 0.1$ )                                                                             | 24.6 ( $\pm 0.1$ )      | 24.6 ( $\pm 0.1$ )                                                                             |
| S4     | $\delta$ [mm s $^{-1}$ ] | 0.25 ( $\pm 0.01$ )     | 0.25 ( $\pm 0.01$ )                                                                            | 0.25 ( $\pm 0.01$ )     | 0.25 ( $\pm 0.01$ )                                                                            |
|        | $B$ [T]                  | 19.7 ( $\pm 0.1$ )      | 19.7 ( $\pm 0.1$ )                                                                             | 19.7 ( $\pm 0.1$ )      | 19.7 ( $\pm 0.1$ )                                                                             |
| S5     | $\delta$ [mm s $^{-1}$ ] | 0.14 ( $\pm 0.02$ )     | 0.14 ( $\pm 0.02$ )                                                                            | 0.15 ( $\pm 0.02$ )     | 0.15 ( $\pm 0.02$ )                                                                            |
|        | $B$ [T]                  | 18.9 ( $\pm 0.2$ )      | 18.9 ( $\pm 0.2$ )                                                                             | 18.9 ( $\pm 0.2$ )      | 18.9 ( $\pm 0.2$ )                                                                             |
